# Supplementary material
Source: ML conference proceedings conference paper supplement (https://openaccess.thecvf.com/content/ICCV_2017/html/Hou_VegFru_A_Domain-Specific_ICCV_2017_paper.html)
Supplement: Supplementary file 1 [file Hou_VegFru_A_Domain-Specific_ICCV_2017_supplemental.pdf]

# Supplementary Material for “VegFru: A Domain-Specific Dataset for Fine-grained Visual Categorization”

Saihui Hou, Yushan Feng and Zilei Wang  
Department of Automation, University of Science and Technology of China  
{saihui, fyushan}@mail.ustc.edu.cn, zlwang@ustc.edu.cn

## 1. More VegFru Samples

### 1.1. Vegetable Samples

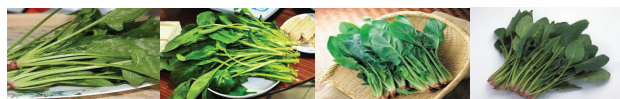

Figure 1. Spinach

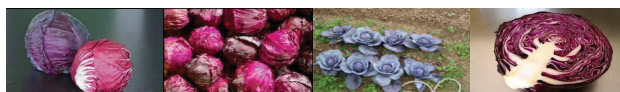

Figure 2. Red Cabbage

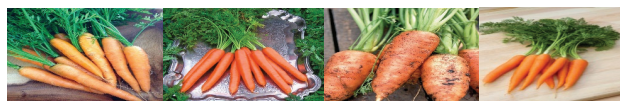

Figure 3. Carrot

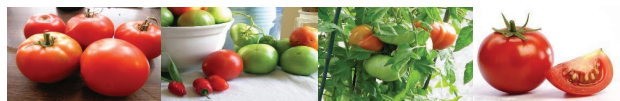

Figure 4. Tomato

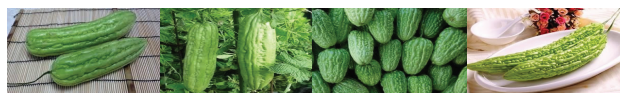

Figure 5. Balsam Pear

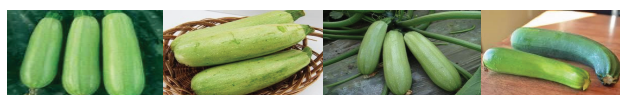

Figure 6. Zucchini

### 1.2. Fruit Samples

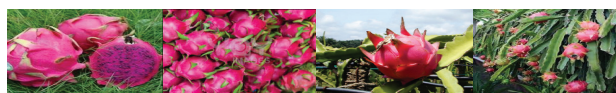

Figure 7. Pitaya

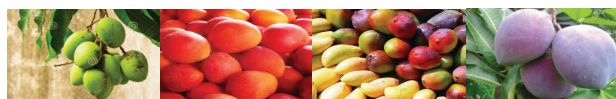

Figure 8. Mango

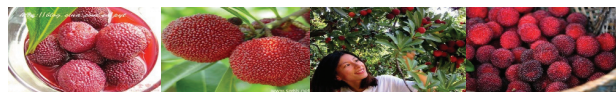

Figure 9. Bayberry

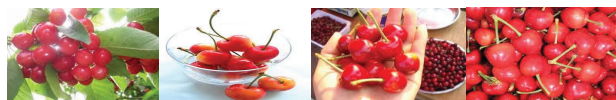

Figure 10. Cherry

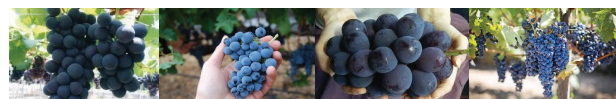

Figure 11. Grape

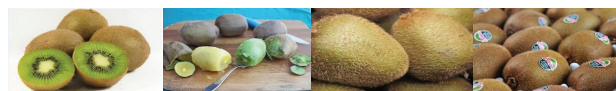

Figure 12. Kiwi Fruit

## 2. Details of VegFru Structure

Table 1. **The sup-classes and sub-classes of VegFru.** #Sub-the number of *sub-classes* included in each *sup-class*.The VegFru has taken in all species of vegetables and fruits in common, which are closely associated with people's diet.

| <i>Sup-class</i>                      | <b>#Sub</b> | <i>Sub-class</i>                                                                                                                                                                                                                                                                                                                                                                                                                                                                                                    |
|---------------------------------------|-------------|---------------------------------------------------------------------------------------------------------------------------------------------------------------------------------------------------------------------------------------------------------------------------------------------------------------------------------------------------------------------------------------------------------------------------------------------------------------------------------------------------------------------|
| Alliaceus                             | 10          | bunching onion, chive, garlic, garlic chive, garlic sprouts, green Chinese onion, leek, onion, scallion, shallot                                                                                                                                                                                                                                                                                                                                                                                                    |
| Aquatic vegetable                     | 13          | arrowhead, cattail, cress, gorgon fruit seed, lotus, lotus root, lotus seed, lotus seedpod, water caltrop, water chestnuts, water shield, watercress, zizania aquatica                                                                                                                                                                                                                                                                                                                                              |
| Beans                                 | 15          | asparagus pea, azuki beans, black soya bean, broad bean, cowpea, hyacinth bean, kidney bean, kidney bean seed, mung bean, pea, sieva bean, sieva bean seed, soybean, soybean seed, sword bean                                                                                                                                                                                                                                                                                                                       |
| Brassia oleracea                      | 9           | broccoli, brussels sprouts, curly kale, head cabbage, red cabbage, savoy caggage, sprouting broccoli, turnip cabbage, Chinese kale                                                                                                                                                                                                                                                                                                                                                                                  |
| Bud seedling                          | 4           | black bean sprouts, mung bean sprouts, peanut sprouts, soybean sprouts                                                                                                                                                                                                                                                                                                                                                                                                                                              |
| Cabbage                               | 5           | flower Chinese cabbage, pakchoi, purple cai-tai, Chinese cabbage, Wuta-tsai                                                                                                                                                                                                                                                                                                                                                                                                                                         |
| Eggplant                              | 7           | cape gooseberry, eggplant, green eggplant, pepper, pimento, tomato, white eggplant                                                                                                                                                                                                                                                                                                                                                                                                                                  |
| Green-leafy vegetable                 | 31          | artemisia selengensis, asparagus lettuce, basella rubra, basil, beefsteak plant, burclove, celery, chicory, chrysanthemum, coriander, dandelion, edible amaranth, endive, fennel, gynura bicolor, houttuynia cordata, kalimeris, leaf lettuce, lettuce, mint, mitsuba, nankingense, parsley, purslane, shepherd's purse, spinach, swiss chard, water spinach, Chinese mallow, Herb of Ghostplant Wormwood, New Zealand spinach                                                                                      |
| Melon                                 | 14          | balsam pear, bottle gourd, chocho, cucumber, gourd, hairy squash, luffa acutangula, luffa cylindrica, pumpkin, snake gourd, watermelon, wax gourd, zucchini, Chinese pumpkin                                                                                                                                                                                                                                                                                                                                        |
| Mushroom                              | 24          | agaricus bisporus, agaricus blazei murill, agrocybe aegerita, bolete, chantarelle, coprinus comatus, dictyophora, enoki mushroom, hen-of-the-woods, hericium, hypsizigis marmoreus, matsutake, morel, nameko, oyster mushroom, pleurotus eryngii, pleurotus nebrodensis, russula virescens, shiitake, straw mushroom, termite mushroom, tremella fuciformis, tricholoma flavovirens, Jew's-ear                                                                                                                      |
| Mustard                               | 2           | mustard, zha-tsai                                                                                                                                                                                                                                                                                                                                                                                                                                                                                                   |
| Perennial and miscellaneous vegetable | 13          | asparagus, bamboo shoot, corn, day lily, globe artichoke, goji berry, mioga ginger, okra, platycodon grandiflorum, rhubarb, strawberry, toon, Lily                                                                                                                                                                                                                                                                                                                                                                  |
| Root vegetable                        | 11          | beetroot, black salsify, burdock root, carrot, celeriac, green radish, kohlrabi, parsnip, red radish, wasabi, white radish                                                                                                                                                                                                                                                                                                                                                                                          |
| Tuber vegetable                       | 10          | ginger, jerusalem artichoke, konnyaku, kudzu, potato, sweet potato, taro, yam bean, Chinese artichoke, Chinese yam                                                                                                                                                                                                                                                                                                                                                                                                  |
| Wild vegetable                        | 32          | achyranthes, adenophora, agrimony, allium, asparagus fern, bassia scoparia, bird pepper, carduus, centella asiatica, commelina, cudweed, cynoglossum lanceolatum, equisetum debile, fallopia multiflora, feather cockscomb, galinsoga parviflora, great Solomon's-seal, horst, milk thistle, ostrich fern, polygonatum sibiricum, polygonum lapathifolium, prickly lettuce, sea of nostoc flagelliforme, self-heal, silverweed, sorrel, thorny amaranth, vetch, viola philippica, wild amaranth, wild chrysanthemum |
| <b>Total</b>                          | <b>200</b>  | <b>15 sup-classes and 200 sub-classes for Vegetables</b>                                                                                                                                                                                                                                                                                                                                                                                                                                                            |
| Berry fruit                           | 22          | banana, black currant, black grape, blueberry, carambola, cherry tomato, fig, ginseng fruit, grape, grape white, guava, kiwi fruit, munlberry, naseberry, passion fruit, pitaya, pomegranate, raspberry, red grape, syzygium jambos, wampee, wax apple                                                                                                                                                                                                                                                              |
| Citrus fruit                          | 13          | blood orange, citrus, dekopon, grapefruit, kumquat, lemon, lime, mandarin orange, navel orange, pomelo, ponkan, sugar orange, trifoliolate orange                                                                                                                                                                                                                                                                                                                                                                   |
| Collective fruit                      | 5           | annona muricata, artocarpus heterophyllus, breadfruit, pineapple, sweetsop                                                                                                                                                                                                                                                                                                                                                                                                                                          |
| Cucurbites                            | 6           | golden melon, honey dew melon, muskmelon, netted melon, papaya, Hami melon                                                                                                                                                                                                                                                                                                                                                                                                                                          |
| Drupe                                 | 13          | apricot, avocado, bayberry, cherry, flat peach, juicy peach, loquat, mango, nectarine, olive, plum, prune, salak                                                                                                                                                                                                                                                                                                                                                                                                    |
| Litchies                              | 3           | litchi, longan, rambutan                                                                                                                                                                                                                                                                                                                                                                                                                                                                                            |
| Nut fruit                             | 11          | almond, cashew nut, coconut, durian, hazelnut, hickory, macadamia, pecans, pistachio, walnuts, Chinese chestnut                                                                                                                                                                                                                                                                                                                                                                                                     |
| Persimmons and jujubes fruit          | 6           | candied date, diospyros lotus, green dates, jujube, persimmon, winter jujube                                                                                                                                                                                                                                                                                                                                                                                                                                        |
| Pome                                  | 11          | apple, bergamot pear, crown pear, gandaria, green apple, hawthorn, housi pear, mangosteen, plum-leaf crab, sand pear, Dangshan Pear                                                                                                                                                                                                                                                                                                                                                                                 |
| other fruit                           | 2           | sugarcane, yacon                                                                                                                                                                                                                                                                                                                                                                                                                                                                                                    |
| <b>Total</b>                          | <b>92</b>   | <b>10 sup-classes and 92 sub-classes for Fruits</b>                                                                                                                                                                                                                                                                                                                                                                                                                                                                 |

### 3. Baselines on the *val* set of VegFru

The performance on the *val* set of VegFru achieved by CaffeNet [2], VGGNet [4] and GoogLeNet [5] is shown in Table 2. The top-1 mean accuracy on the *val* set is close to that on the *test* set.

Table 2. **Baselines on the *val* set of VegFru.** The CaffeNet, VGGNet and GoogLeNet are chosen to set the benchmarks. All results are reported in the top-1 mean accuracy.

| Dataset                     | Category               | CaffeNet | VGGNet | GoogLeNet |
|-----------------------------|------------------------|----------|--------|-----------|
| Veg200<br>( <i>val</i> set) | 15 <i>sup-classes</i>  | 75.59%   | 83.67% | 83.99%    |
|                             | 200 <i>sub-classes</i> | 67.00%   | 78.26% | 79.92%    |
| Fru92<br>( <i>val</i> set)  | 10 <i>sup-classes</i>  | 81.89%   | 88.48% | 88.17%    |
|                             | 92 <i>sub-classes</i>  | 72.00%   | 79.65% | 81.65%    |
| VegFru<br>( <i>val</i> set) | 25 <i>sup-classes</i>  | 74.42%   | 82.94% | 83.06%    |
|                             | 292 <i>sub-classes</i> | 66.52%   | 77.34% | 79.73%    |

### 4. Evaluate HybridNet on the coarse-grained categorization

Here we provide the experimental results of evaluating HybridNet on the coarse-grained categorization. The network architecture and training strategy keep the same except that the *Fused Classifier* is changed to handle the coarse-grained categorization. The results are shown in Table 3 and reported on VegFru and FGVC-Aircrafts. The coarse-grained categorization is less challenging than fine-grained categorization, and the accuracy with CBP-CNN is relatively high (VegFru: 83.84%, FGVC-Aircrafts: 94.03%). The experiments show that the results of coarse-grained categorization with HybridNet (VegFru: 84.27%, FGVC-Aircrafts: 94.33%) are a little improved compared to CBP-CNN on both datasets.

Table 3. **Performance comparison for HybridNet on the coarse-grained categorization.** HybridNet is trained on the *train* set of VegFru and *trainval* set of FGVC-Aircraft [3]. All results are evaluated on the *test* set and reported in the top-1 mean accuracy.

| Dataset          | VegFru<br>(25 <i>sup-classes</i> ) | Aircrafts [3]<br>(70 <i>sup-classes</i> ) |
|------------------|------------------------------------|-------------------------------------------|
| CBP-CNN [1]      | 83.84%                             | 94.03%                                    |
| HybridNet (ours) | <b>84.27%</b>                      | <b>94.33%</b>                             |

- [3] S. Maji, J. Kannala, E. Rahtu, M. Blaschko, and A. Vedaldi. Fine-grained visual classification of aircraft. Technical report, 2013. 3
- [4] K. Simonyan and A. Zisserman. Very deep convolutional networks for large-scale image recognition. *arXiv preprint arXiv:1409.1556*, 2014. 3
- [5] C. Szegedy, W. Liu, Y. Jia, P. Sermanet, S. Reed, D. Anguelov, D. Erhan, V. Vanhoucke, and A. Rabinovich. Going deeper with convolutions. In *CVPR*, 2015. 3

### References

- [1] Y. Gao, O. Beijbom, N. Zhang, and T. Darrell. Compact bilinear pooling. In *CVPR*, 2016. 3
- [2] A. Krizhevsky, I. Sutskever, and G. E. Hinton. Imagenet classification with deep convolutional neural networks. In *NIPS*, 2012. 3
